# Supplementary material for: Determination of the Phenolic Profile and Antioxidant Properties of Salvia viridis L. Shoots: A Comparison of Aqueous and Hydroethanolic Extracts
Source: PubMed Central journal article supplement (PMC6099398; doi:10.3390/molecules23061468), 2018-06-17

## Supplementary materials

**Figure S1.**

The comparison of UPLC-UV chromatogram of decoction and hydroethanolic extract from aerial parts of *S. viridis*

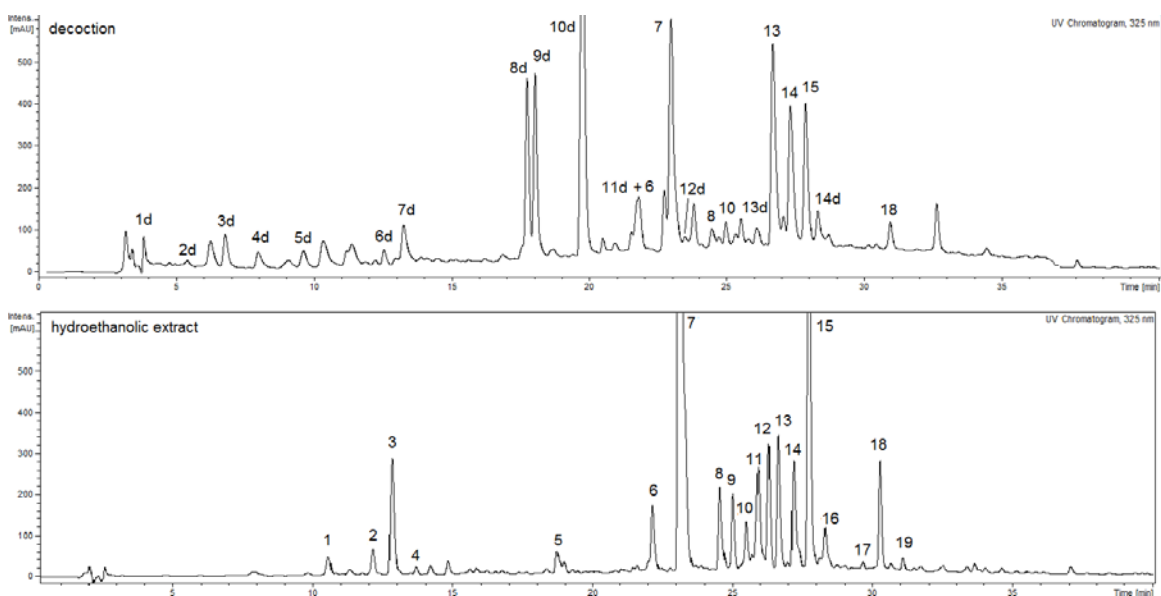

1- 6-*O*-caffeoylglucose, 2- 6-*O*-caffeoylglucose, 3- 5-*O*-caffeoylquinic acid, 4- 4-*O*-caffeoylquinic acid, 5- caffeoyl-hexoside derivative, 6- luteolin-*O*-rutinoside, 7- verbascoside, 8- forsythoside A, 9- isoverbascoside, 10- lipedoside A, 11- dicaffeoylquinic acid, 12- leucoseptoside A, 13- apigenin-*O*-hexuronide, 14- methyluteolin-*O*-hexuronide, 15- rosmarinic acid, 16- unidentified phenylethanoid, 17- luteolin-*O*-dihexoside, 18- martynoside, 19- isomartynoside, 1d- quinic acid, 2d- hydroxytyrosol hexoside, 3d- caffeic acid rutoside, 4d- caffeic acid hexoside, 5d- caffeic acid hexoside, 6d- caffeic acid rutoside, 7d- caffeic acid, 8d-  $\beta$ -hydroxyverbascoside, 9d-  $\beta$ -hydroxyisoverbascoside, 10-  $\beta$ -hydroxyforsythoside A, 11d-  $\beta$ -oxoacteoside, 12-14d - oxidized verbascoside derivatives.

## Figure S2.

UV spectra and MS spectra in negative ion mode of phenolic compounds from extracts of shoots of *S. viridis*.

### Peak 1

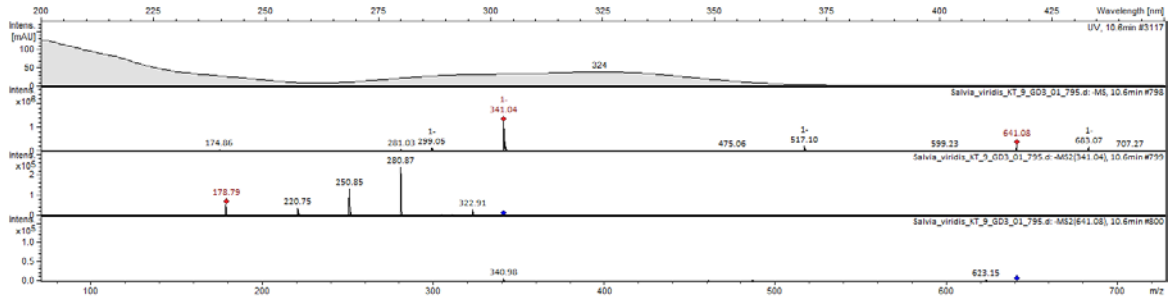

### Peak 2

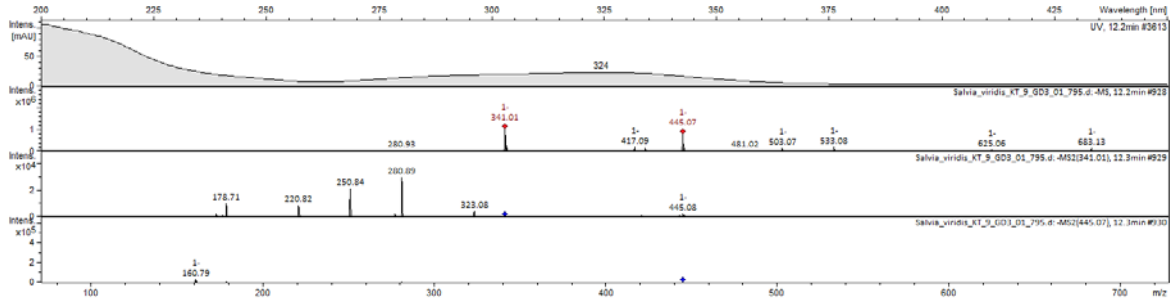

### Peak 3

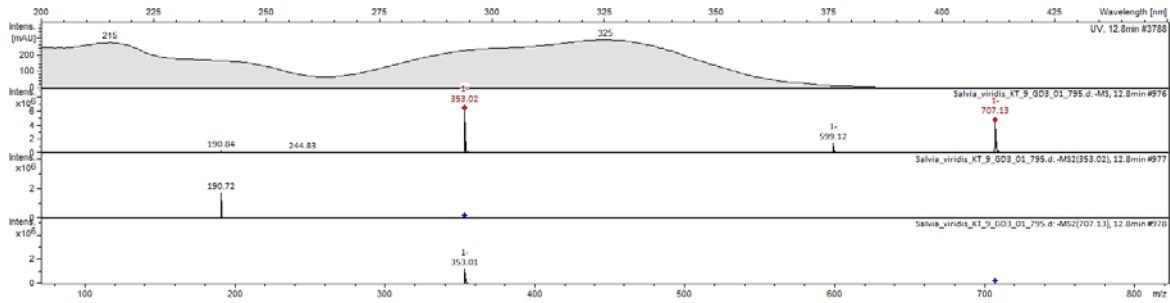

### Peak 4

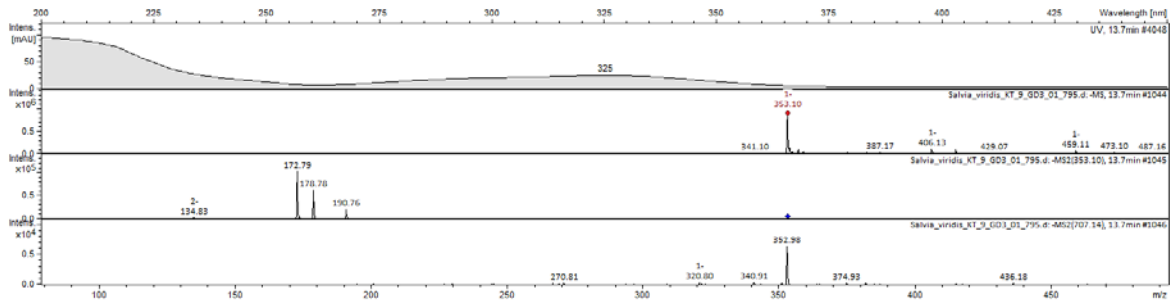

### Peak 5

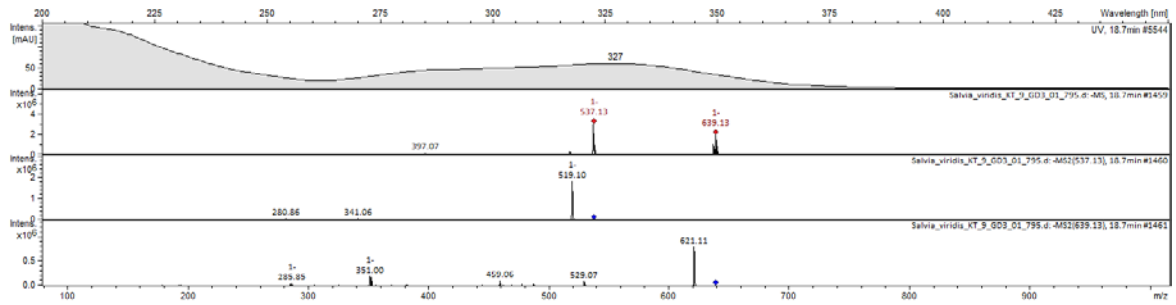

### Peak 6

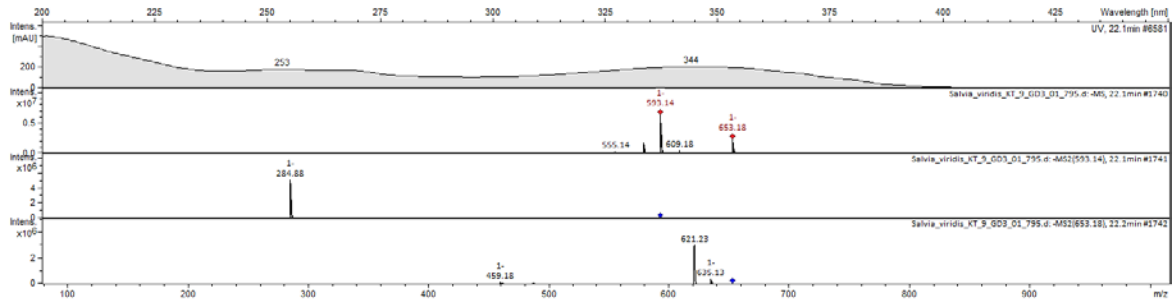

### Peak 7

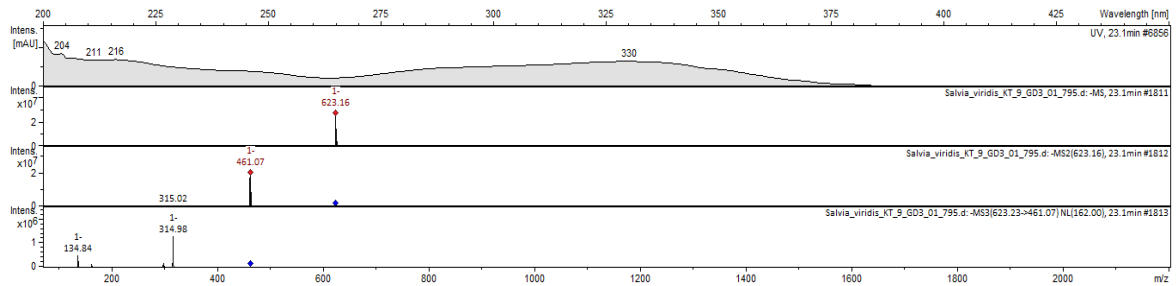

### Peak 8

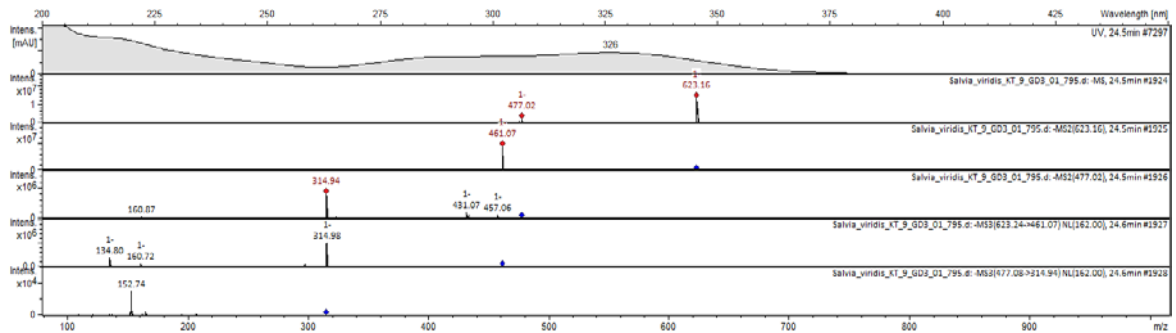

### Peak 9

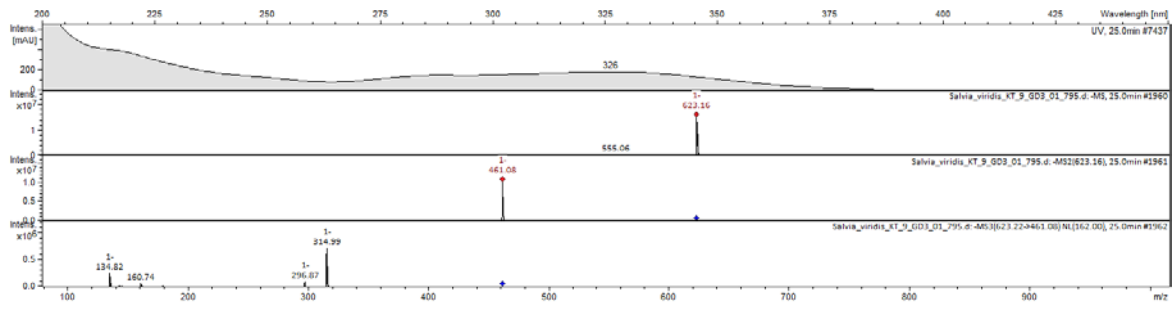

### Peak 10

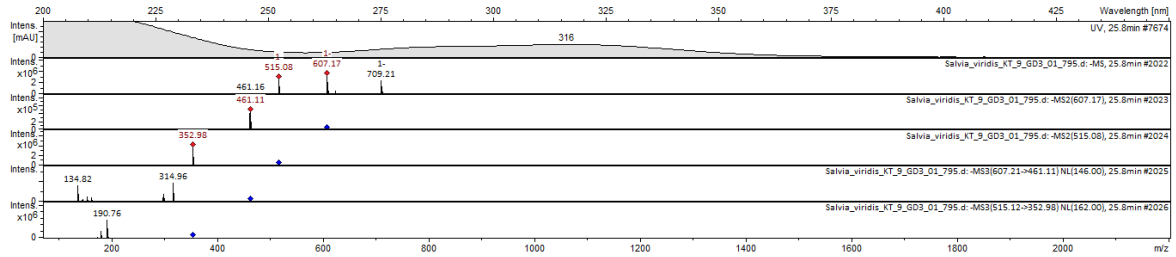

### Peak 11

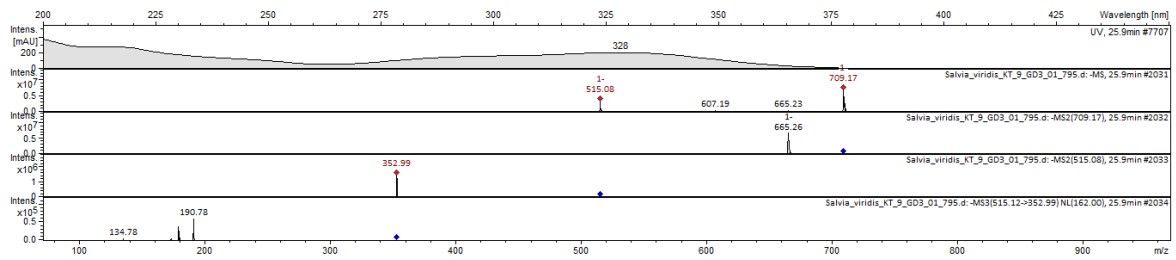

### Peak 12

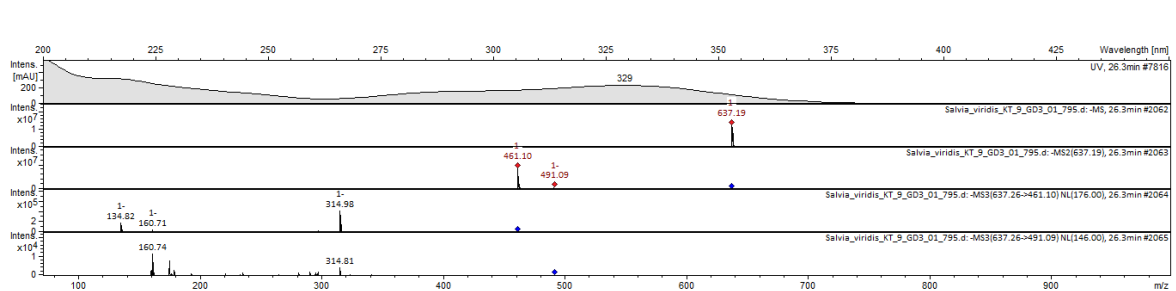

### Peak 13

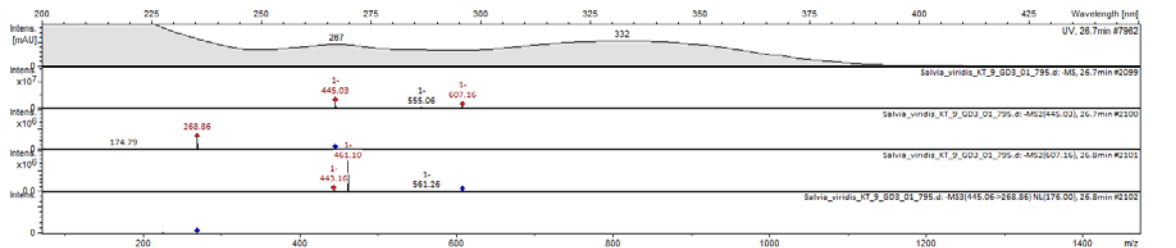

### Peak 14

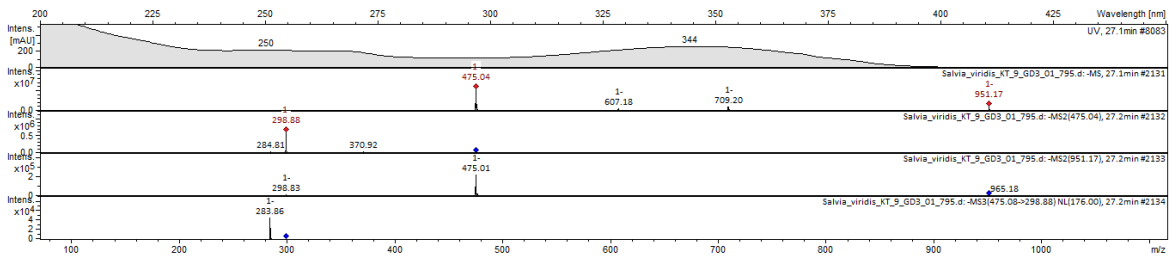

### Peak 15

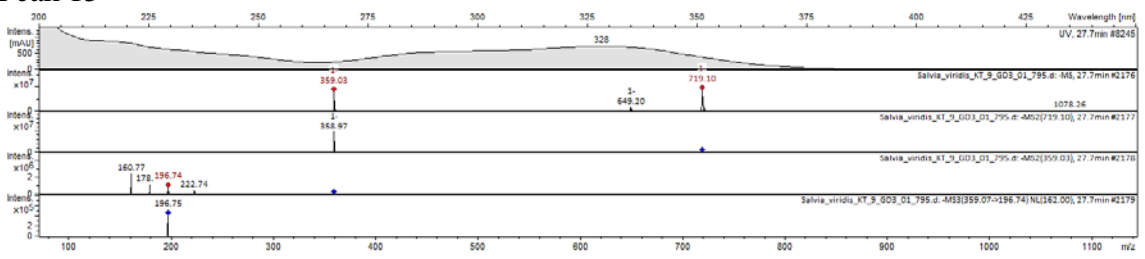

### Peak 16

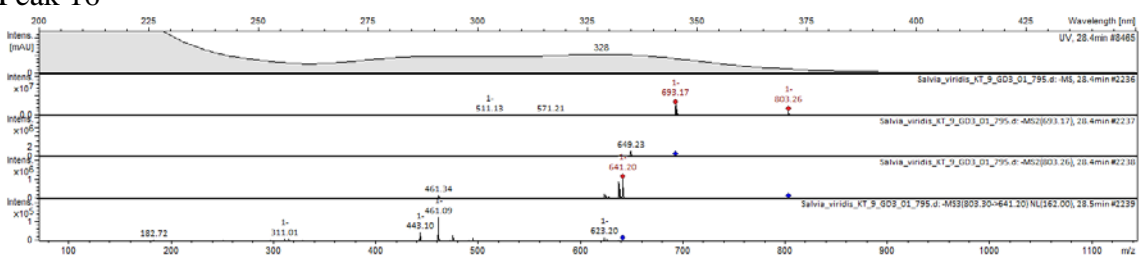

### Peak 17

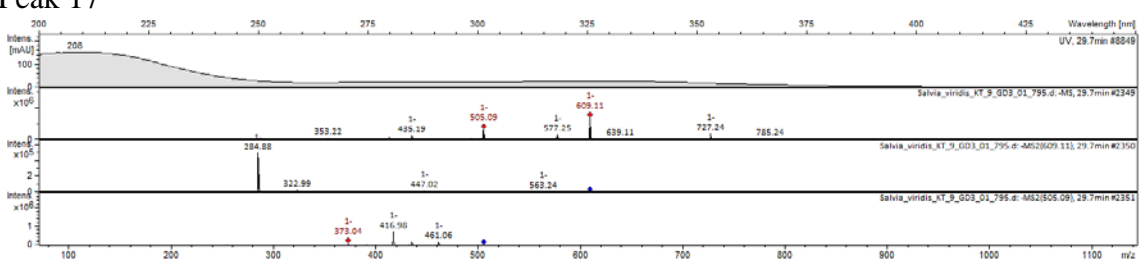

### Peak 18

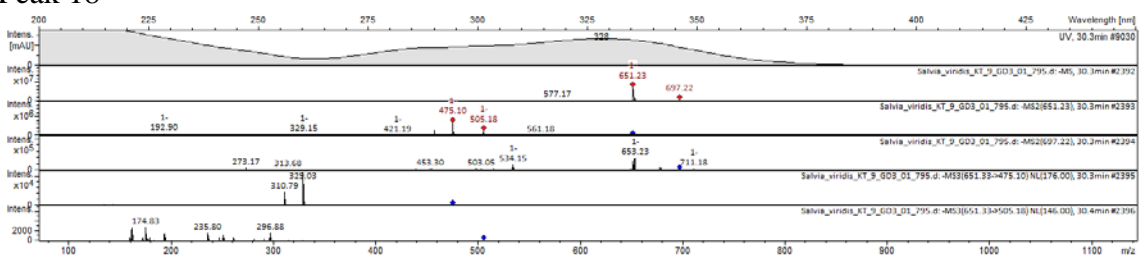

# Peak 19

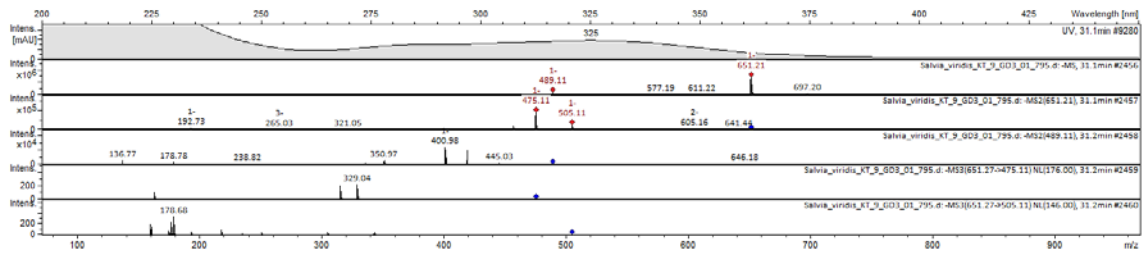

Supplement: molecules-23-01468-s001.pdf [file molecules-23-01468-s001.pdf]
